# Supplementary material for: Epigenetic machinery is functionally conserved in cephalopods
Source: bioRxiv or medRxiv preprint supplement (doi:10.1101/2021.11.18.469068), 2022-03-04

***O. bimaculoides* Adult**

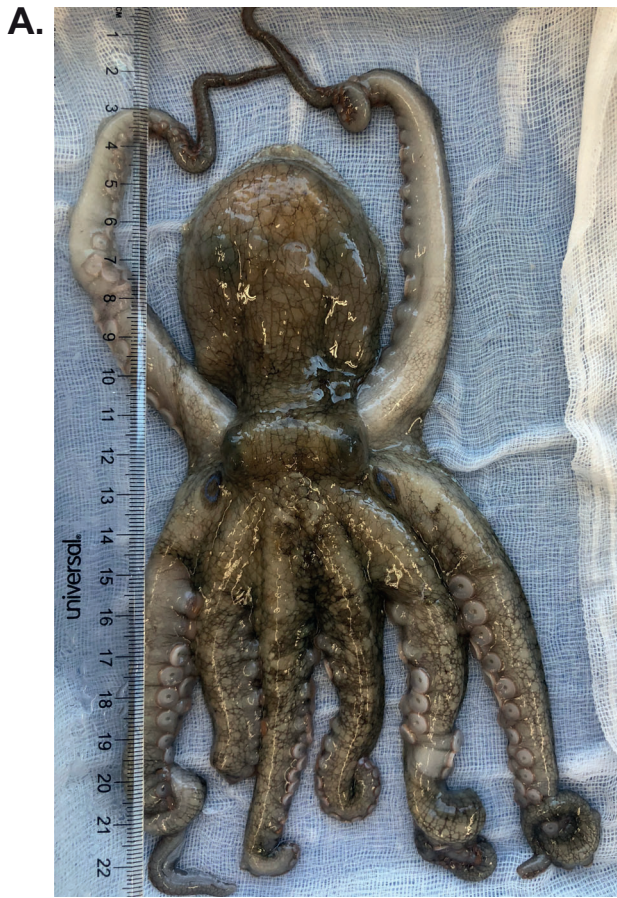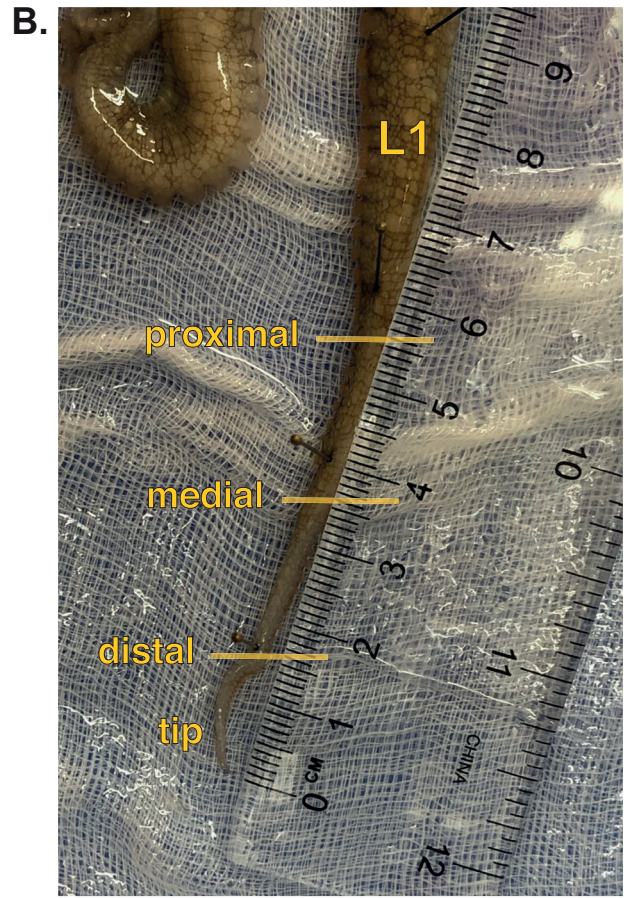

***O. bimaculoides* Hatchling 30 days**

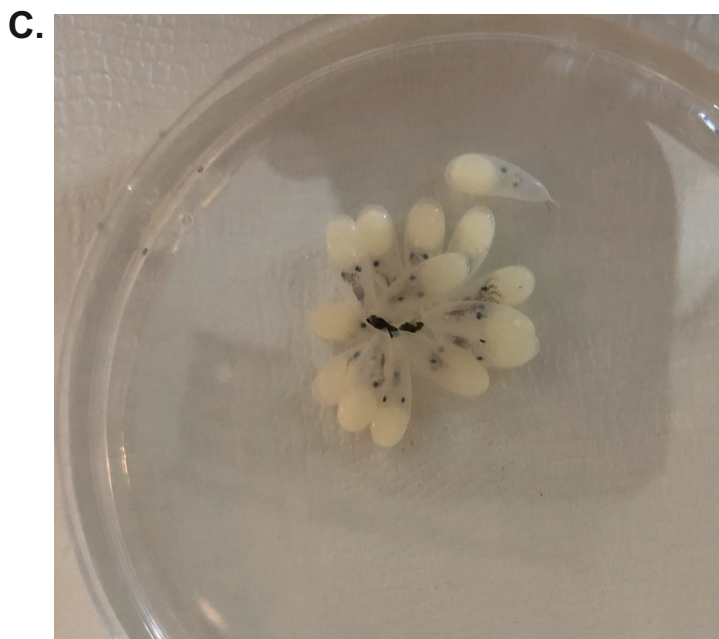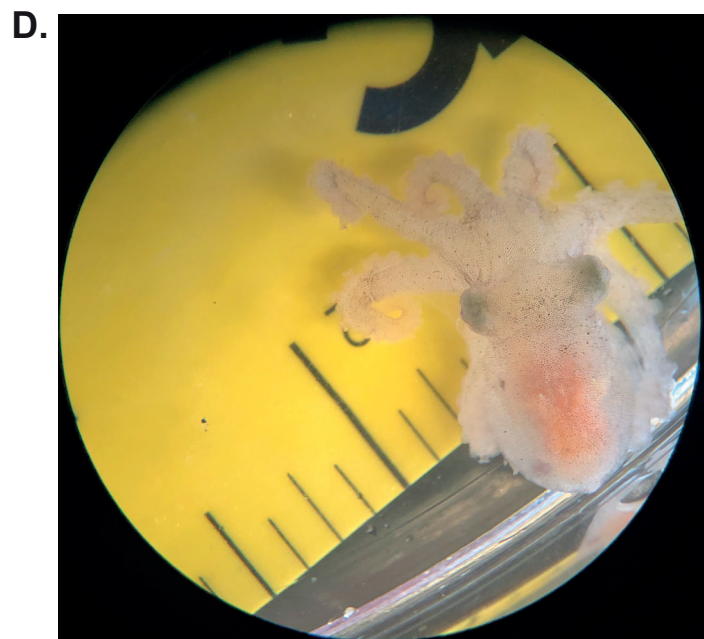

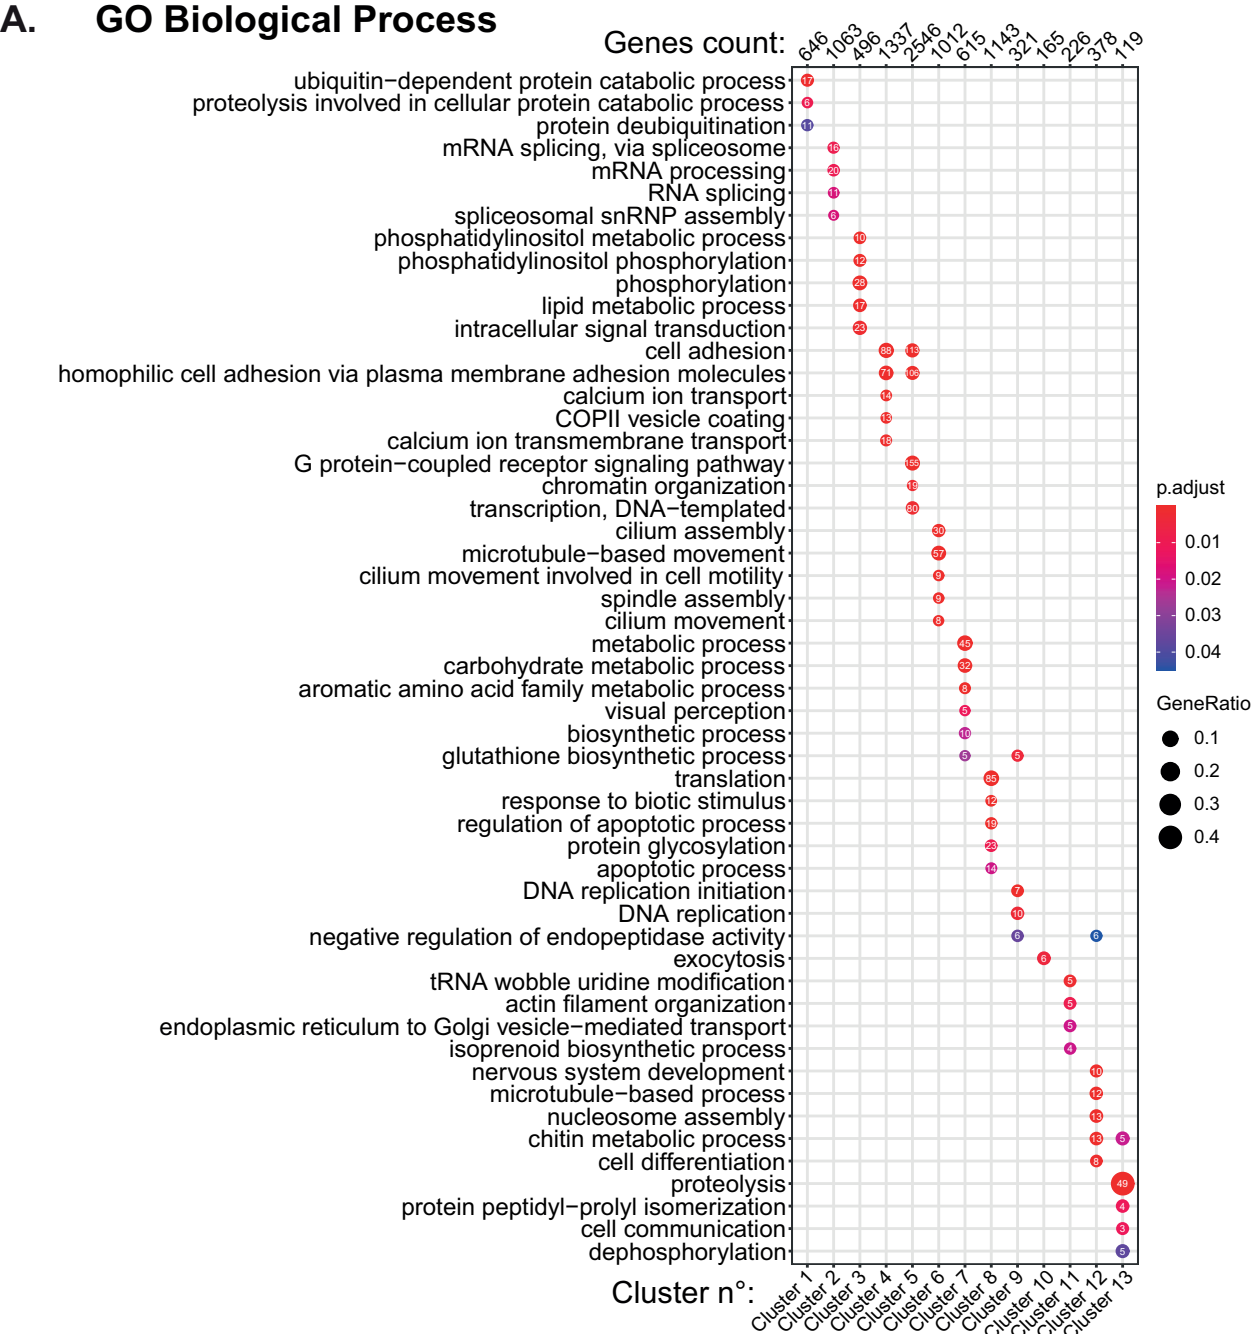

### B. GO Cellular Component

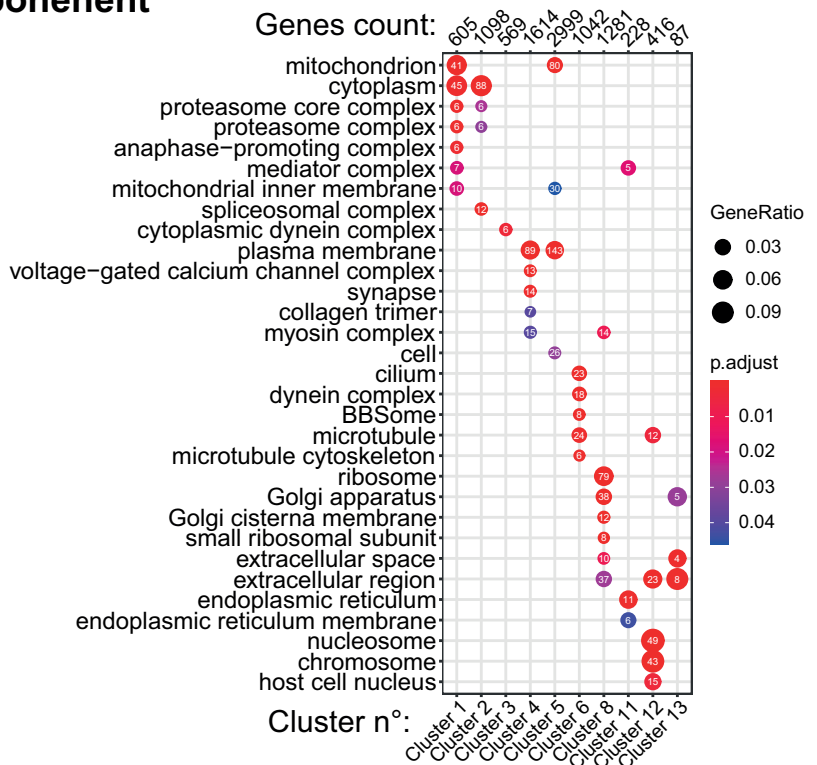



**A. Metazoa 50: DNMT1**

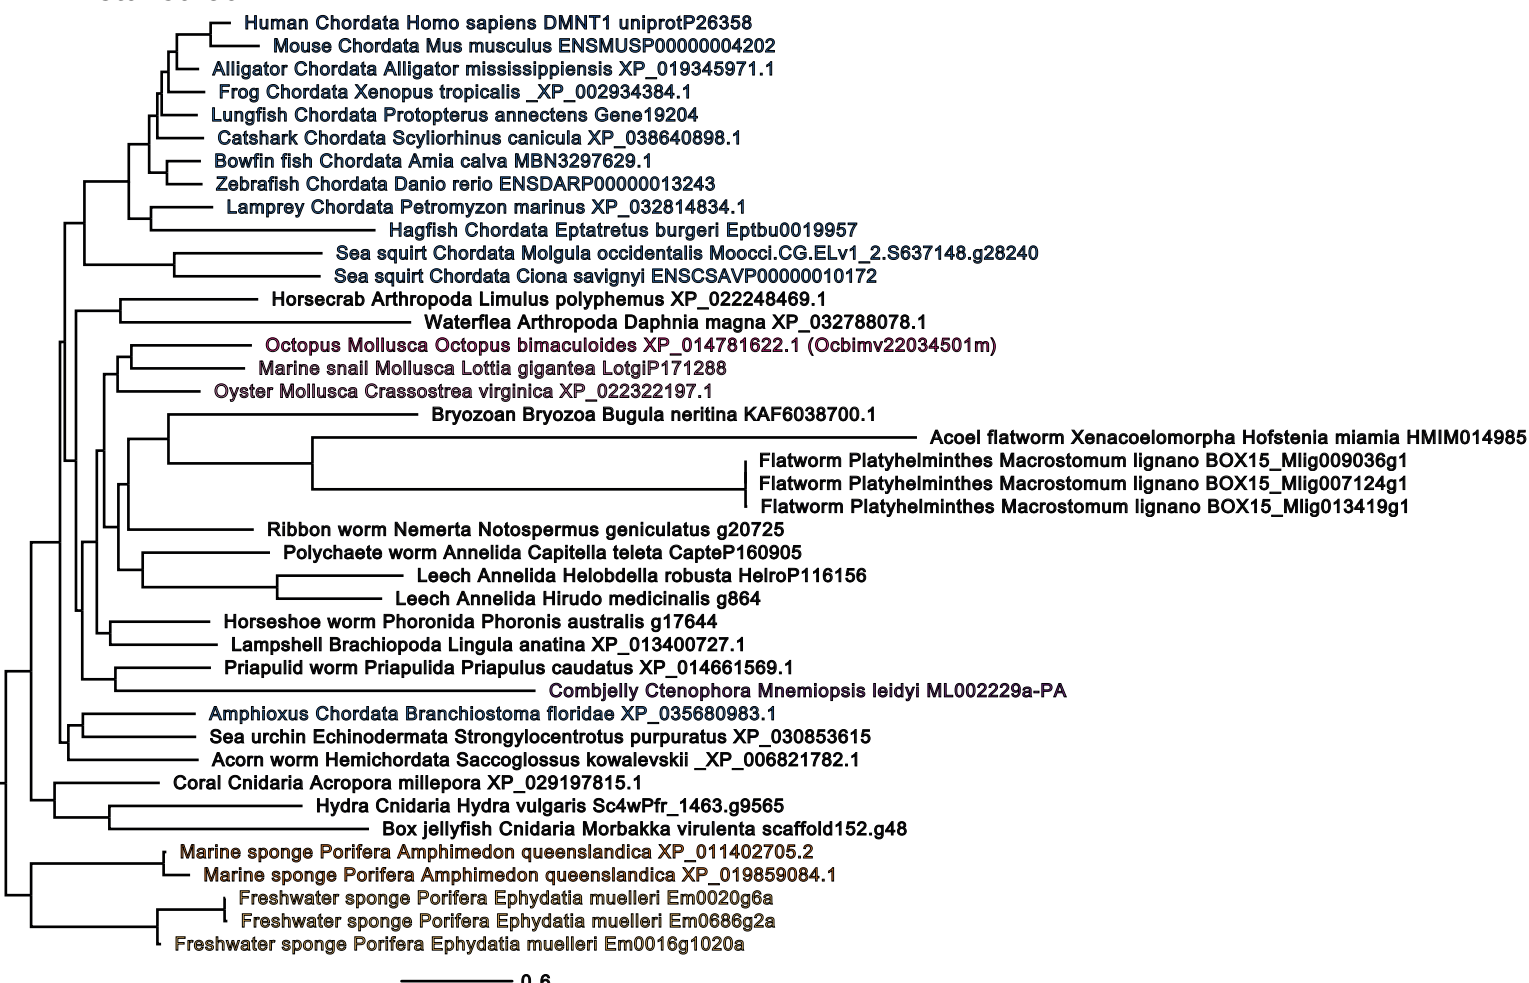

**B. Metazoa 50: UHRF1**

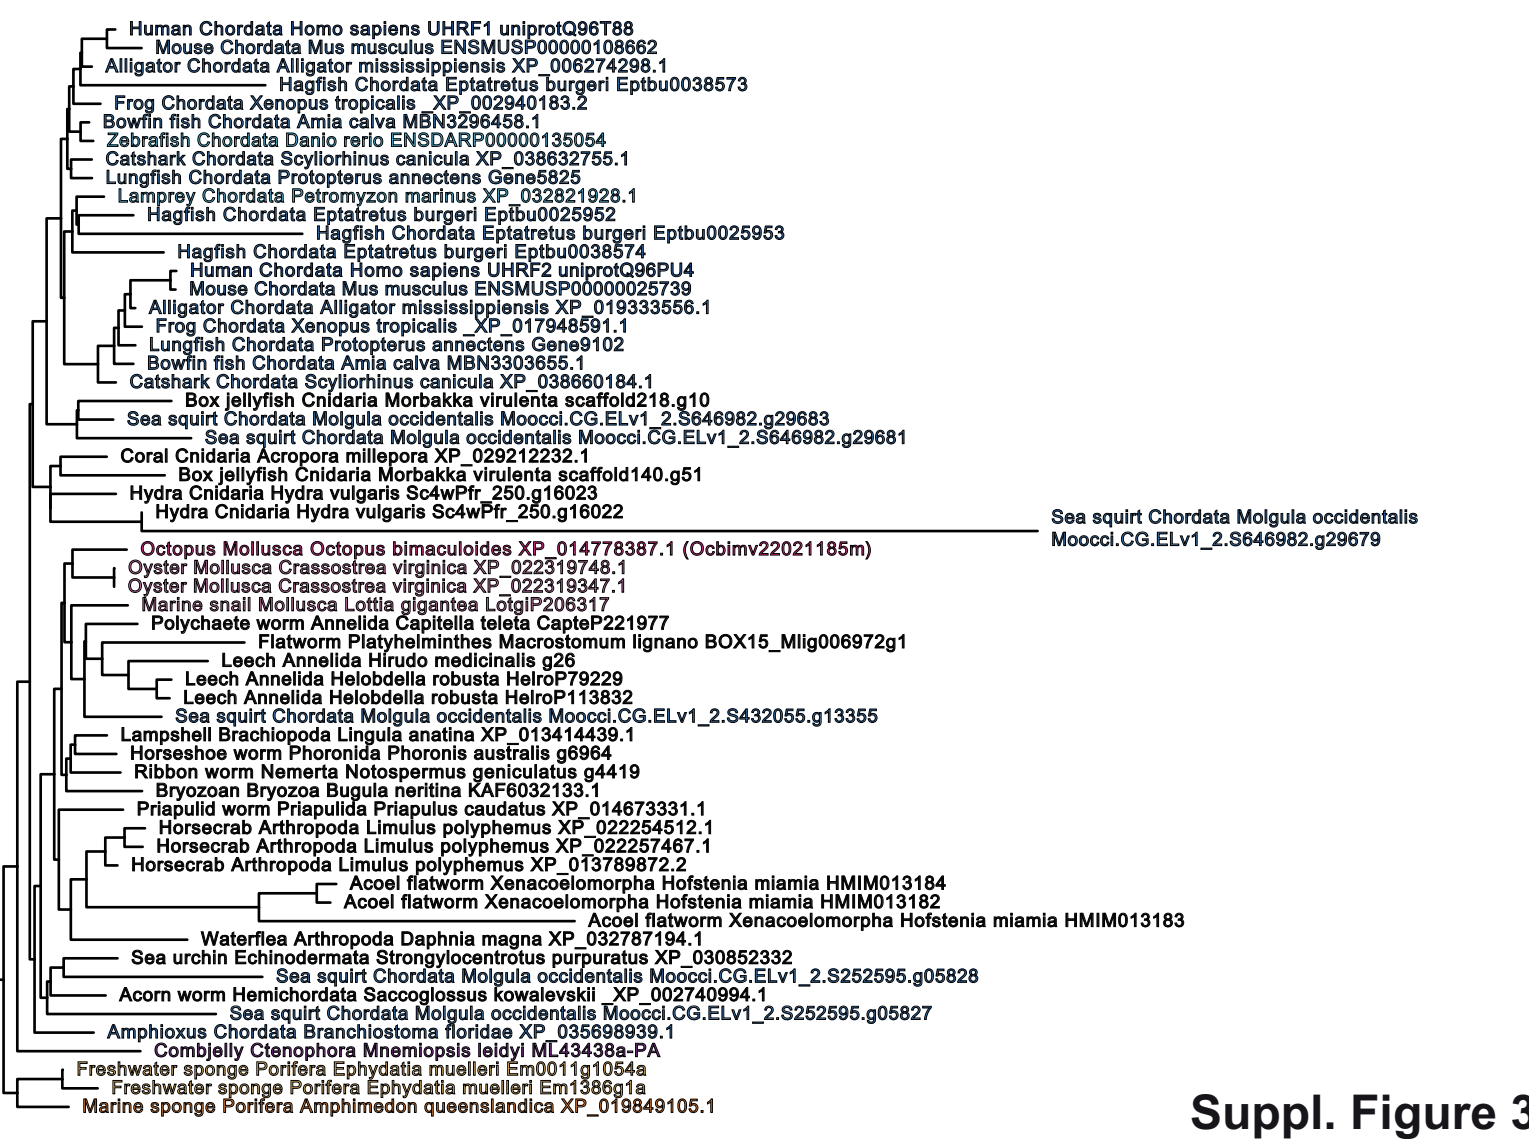

### A. DNMT1\_OCTBM

| Domain                               | Pfam ID       | Bit Score | Domain E-values |         |
|--------------------------------------|---------------|-----------|-----------------|---------|
|                                      |               |           | Ind.            | Cond.   |
| RFTD                                 | DNMT1-RFD     | 138.86    | 1.2e-40         | 2.7e-44 |
| CXXC                                 | zf-CXXC       | 47.88     | 1.0e-12         | 2.2e-16 |
| BAH1                                 | BAH           | 55.25     | 5.7e-15         | 1.3e-18 |
| BAH2                                 | BAH           | 55.65     | 4.3e-15         | 9.5e-19 |
| CTD (C-5 cytosine methyltransferase) | DNA_methylase | 165.85    | 1.5e-48         | 3.4e-52 |

HMMER (*O. bimaculoides* protein sequence vs. entire protein sequence database)

### C. UHRF1\_OCTBM

| Domain | Pfam ID       | Bit Score          | Domain E-values                 |         |
|--------|---------------|--------------------|---------------------------------|---------|
|        |               |                    | Ind.                            | Cond.   |
| UBL    | ubiquitin     | 52.61              | 2.8e-14                         | 6.2e-18 |
| TTD    | TTD           | 171.29             | 1.3e-50                         | 2.9e-54 |
| PHD    | PHD           | 47.58              | 1.1e-12                         | 2.5e-16 |
| SRA    | SAD_SRA       | 190.13             | 1.9e-56                         | 4.2e-60 |
| RING   | Not unique ID | Manually annotated | % identity (count) = 64.1% (39) |         |

HMMER (*O. bimaculoides* protein sequence vs. entire protein sequence database)

### E. YDG\_OCTBM

| Domain | Pfam ID | Bit Score | Domain E-values |         |
|--------|---------|-----------|-----------------|---------|
|        |         |           | Ind.            | Cond.   |
| SRA    | SAD_SRA | 195.46    | 4.3e-58         | 2.4e-62 |

HMMER (*O. bimaculoides* protein sequence vs. entire protein sequence database)

### G.

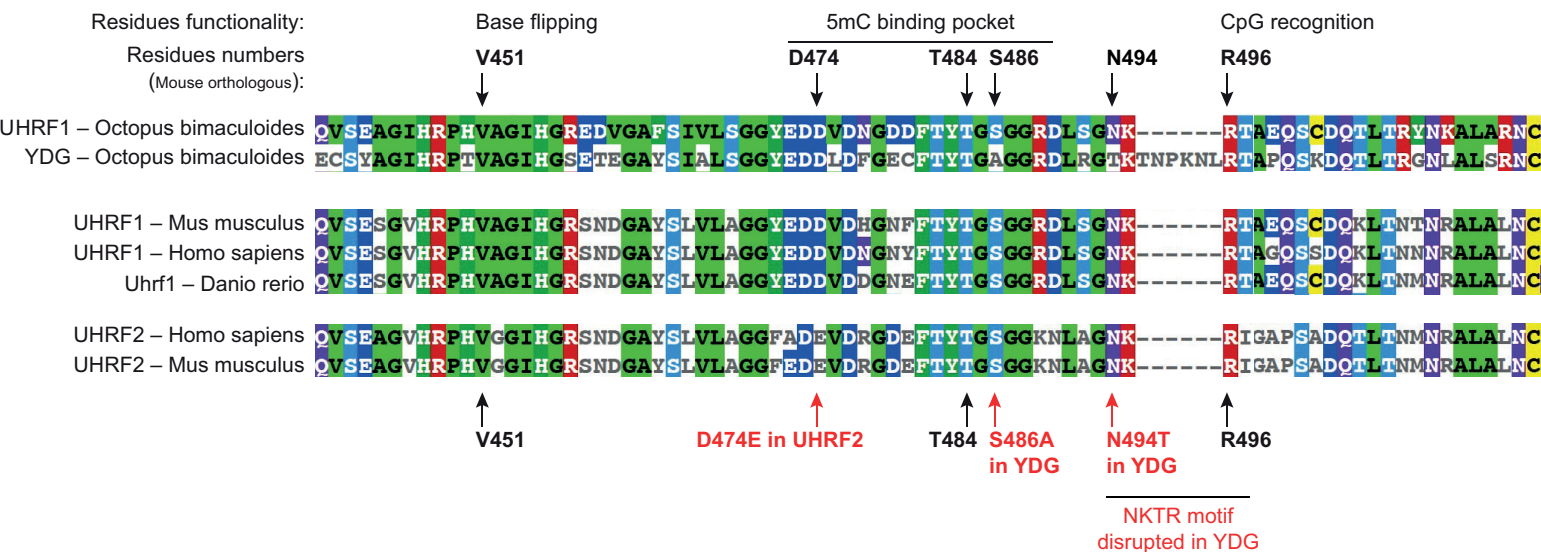

### B. DNMT1\_OCTBM

| Organism             | UniProt ID | Gene ID                  | % of Identity |
|----------------------|------------|--------------------------|---------------|
| Octopus bimaculoides | A0A0L8GEZ1 | <i>Ocbimv22034501m.g</i> | 100.00        |
| Danio rerio          | Q8QGB8     | <i>dnmt1</i>             | 56.01         |
| Homo sapiens         | P26358     | <i>DNMT1</i>             | 54.79         |
| Mus musculus         | P13864     | <i>Dnmt1</i>             | 52.24         |

ClustalOmega multiple protein sequence alignment

### D. UHRF1\_OCTBM

| Organism             | UniProt ID | Gene ID                  | % of Identity |
|----------------------|------------|--------------------------|---------------|
| Octopus bimaculoides | A0A0L8IC59 | <i>Ocbimv22021185m.g</i> | 100.00        |
| Danio rerio          | E7EF3      | <i>uhrf1</i>             | 56.37         |
| Homo sapiens         | Q96T88     | <i>UHRF1</i>             | 55.88         |
| Mus musculus         | Q8VDF2     | <i>Uhrf1</i>             | 53.55         |
| Homo sapiens         | Q96PU4     | <i>UHRF2</i>             | 50.19         |
| Mus musculus         | Q7TMI3     | <i>Uhrf2</i>             | 50.00         |

ClustalOmega multiple protein sequence alignment

### F. YDG\_OCTBM

| Organism             | UniProt ID | Gene ID                  | % of Identity |
|----------------------|------------|--------------------------|---------------|
| Octopus bimaculoides | A0A0L8H8G0 | <i>Ocbimv22020196m.g</i> | 100.00        |
| Mus musculus         | Q8VDF2     | <i>Uhrf1</i>             | 34.46         |
| Homo sapiens         | Q96T88     | <i>UHRF1</i>             | 33.53         |
| Danio rerio          | E7EF3      | <i>uhrf1</i>             | 32.42         |
| Mus musculus         | Q7TMI3     | <i>Uhrf2</i>             | 31.69         |
| Homo sapiens         | Q96PU4     | <i>UHRF2</i>             | 31.08         |

ClustalOmega multiple protein sequence alignment

**A.****DNMT1**  
Mouse BAH1/2 & CTD domains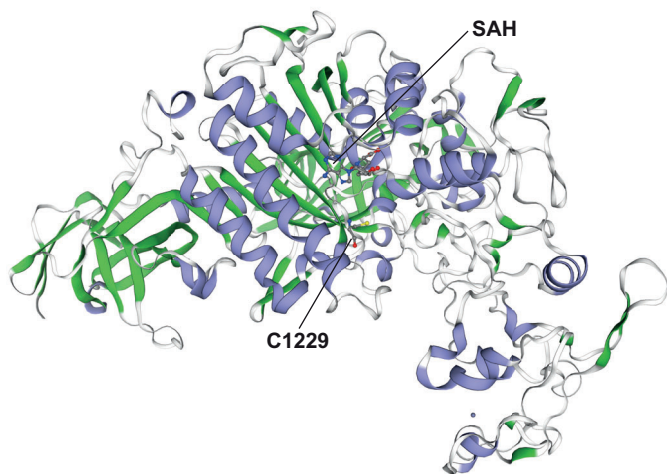**B.****DNMT1**  
Octopus BAH1/2 & CTD domains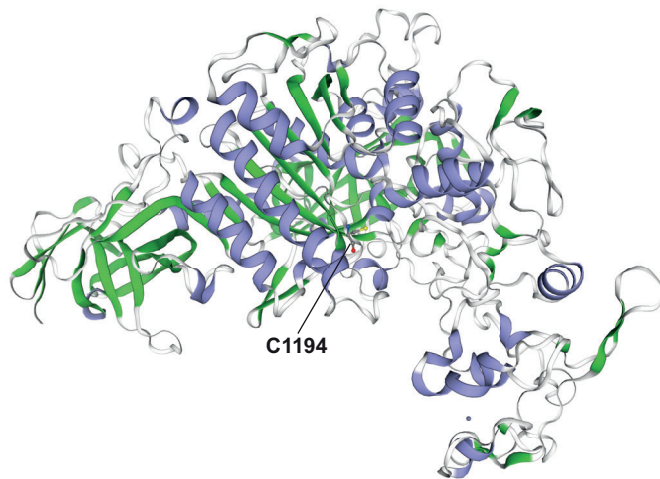**C.****UHRF1**  
Mouse SRA domain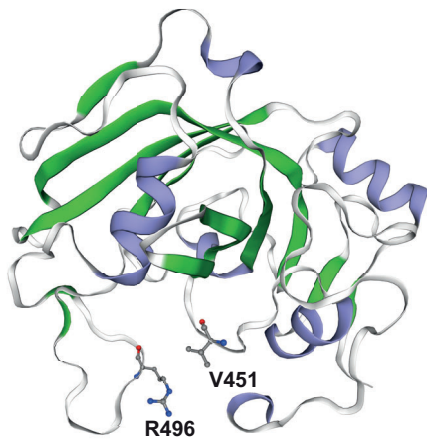**D.****UHRF1**  
Octopus SRA domain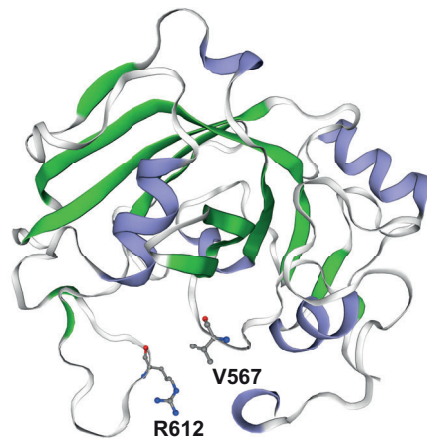

**A.**

| Total CpGs            | 80,660,576   |                        |                          |
|-----------------------|--------------|------------------------|--------------------------|
| Sample                | Covered CpGs | Methylated CpGs (>80%) | Unmethylated CpGs (<20%) |
| <b>RRBS Hatchling</b> | 2,403,266    | 87,223                 | 2,172,200                |
| Percent of total      | 2.98%        | 3.63%                  | 90.39%                   |
| <b>WGBS Supra E</b>   | 64,845,686   | 3,897,277              | 55,918,461               |
| Percent of total      | 80.39%       | 6.01%                  | 86.23%                   |
| <b>WGBS Sub E</b>     | 47,053,504   | 3,542,069              | 40,626,272               |
| Percent of total      | 58.34%       | 7.53%                  | 86.34%                   |

**B.**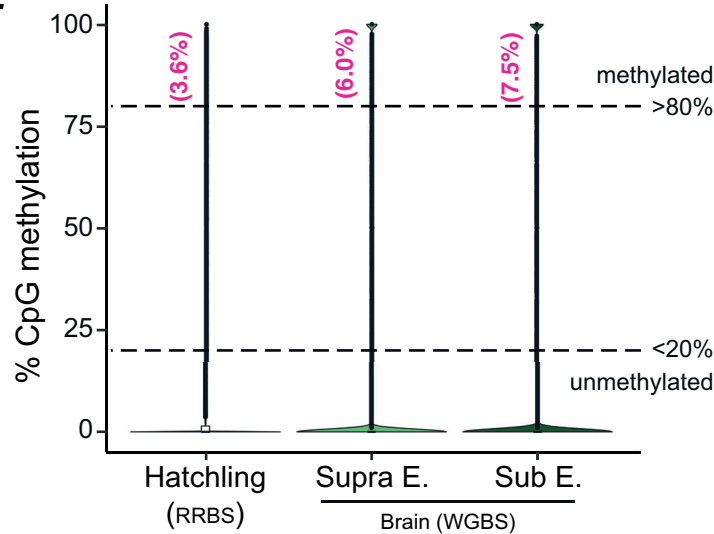**C.****REs in Hatchling**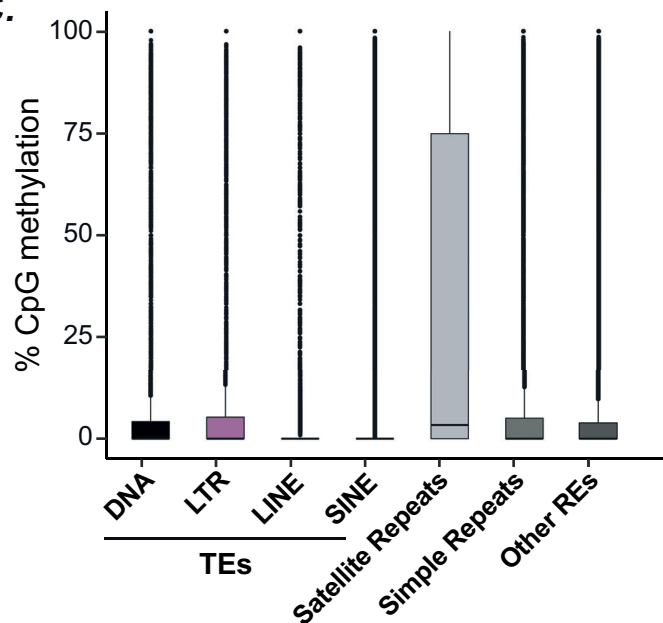



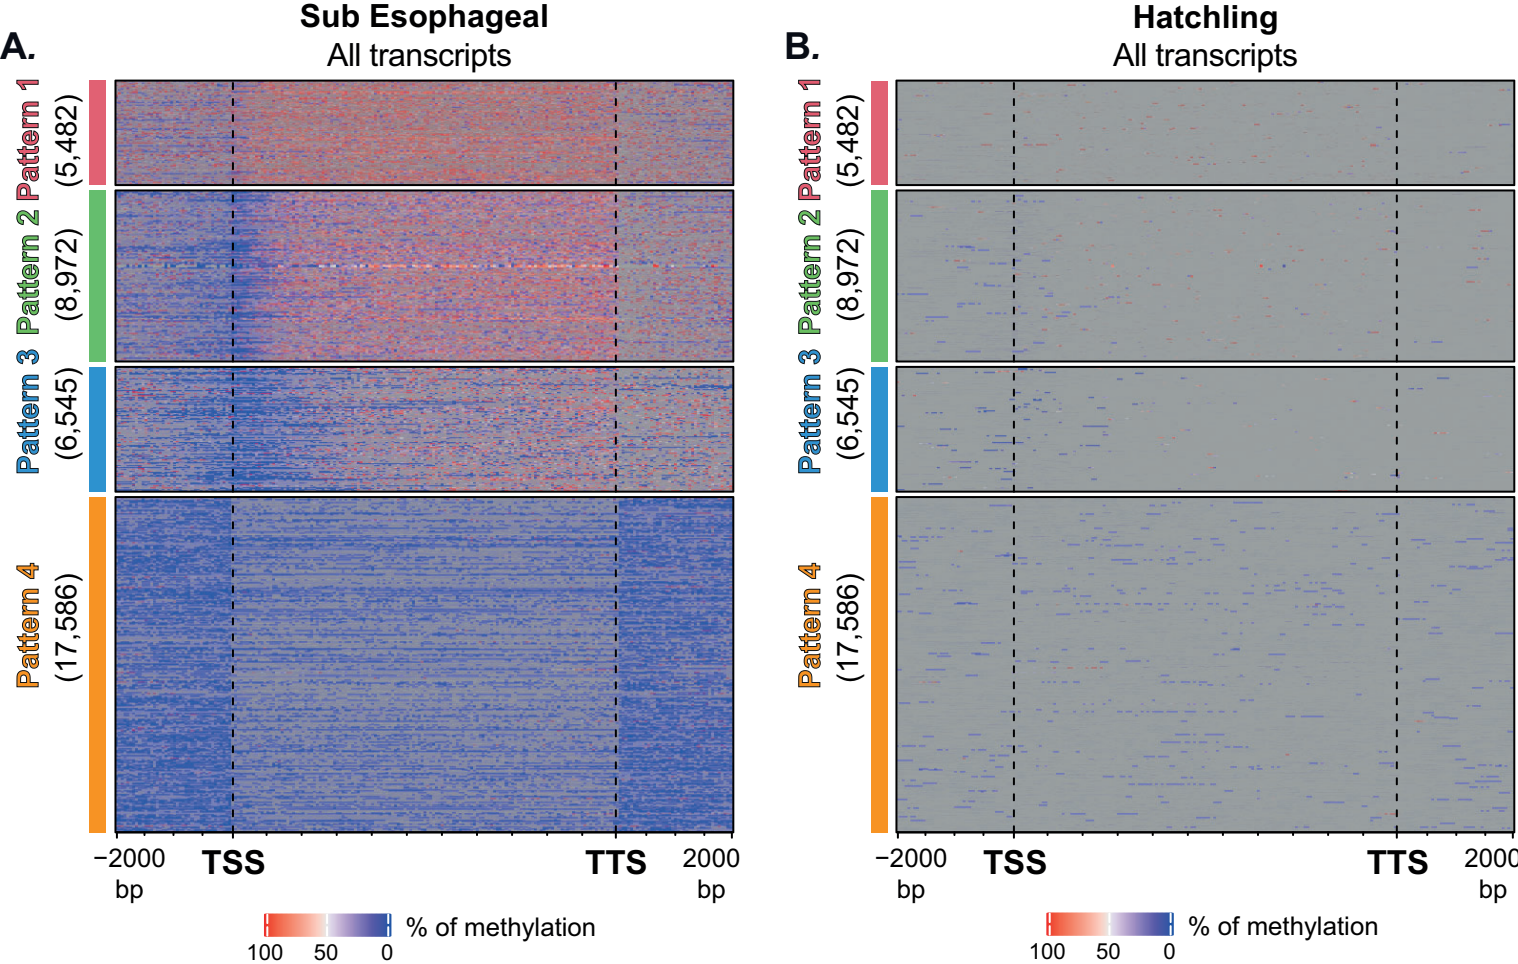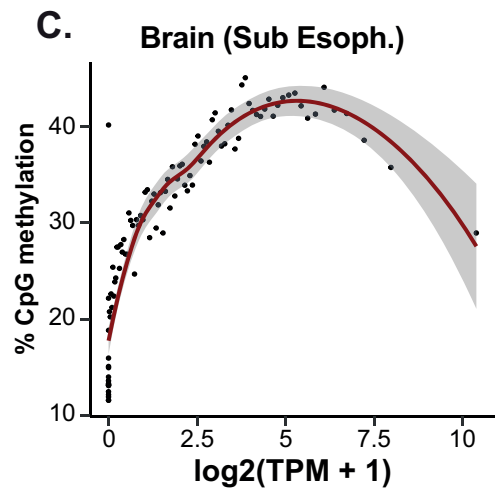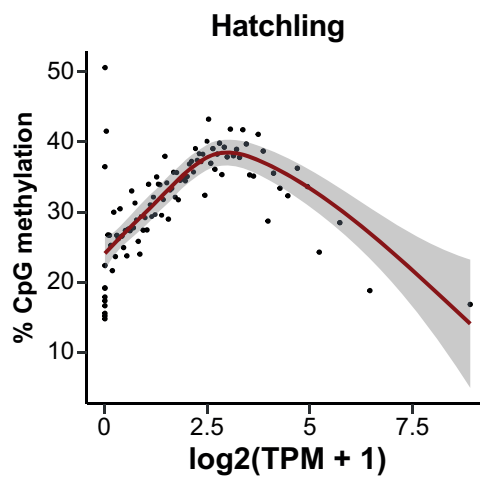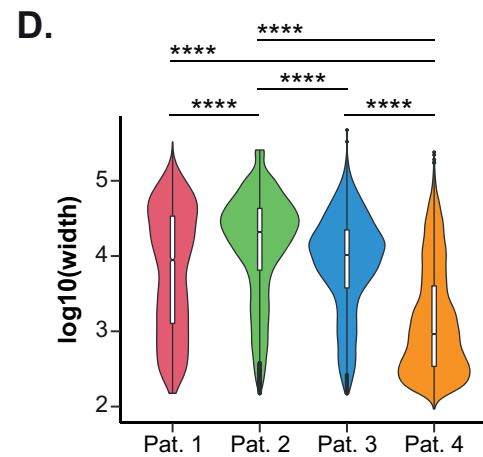

Suppl. Figure 7

## A. EZH2

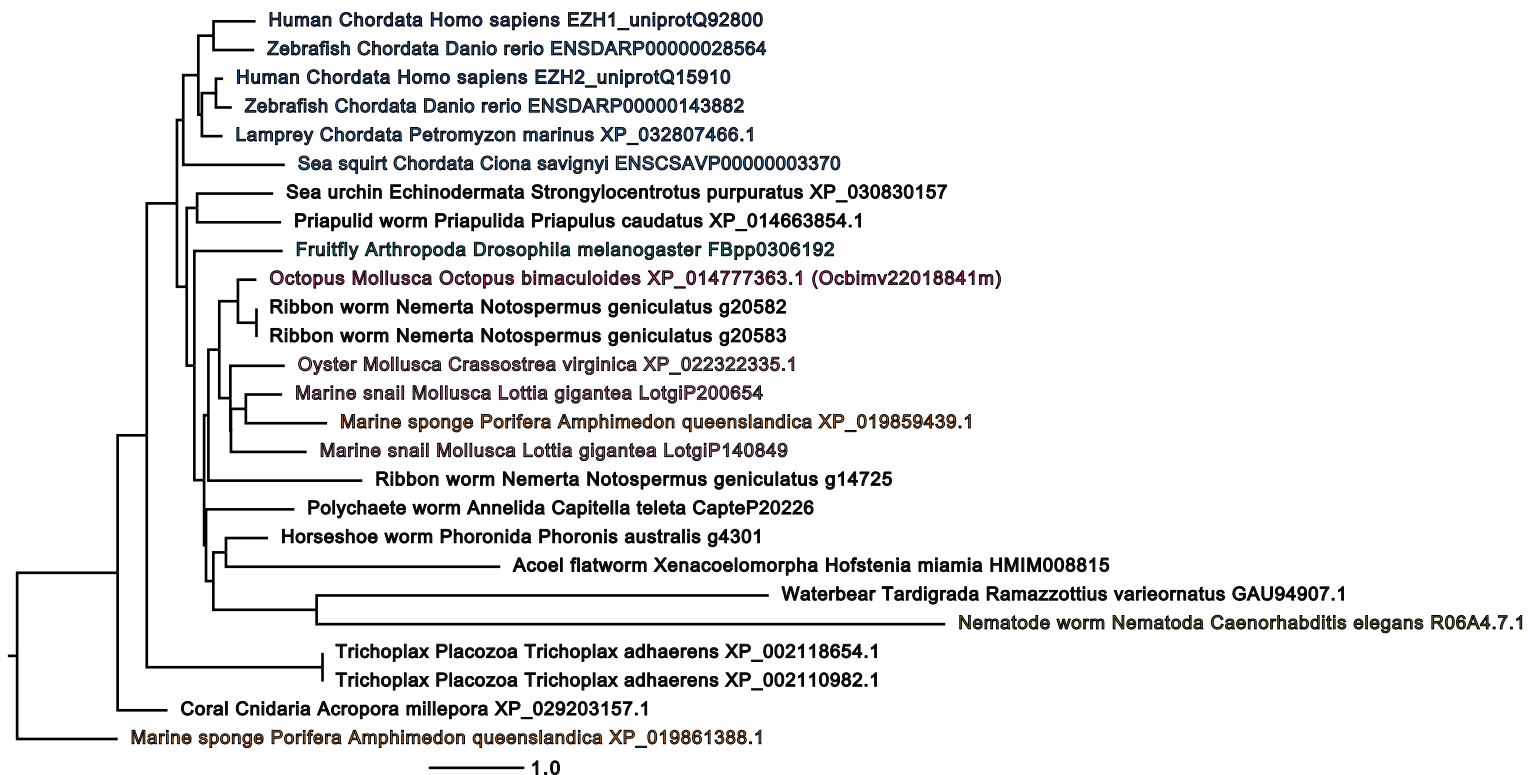

## B. KAT2A

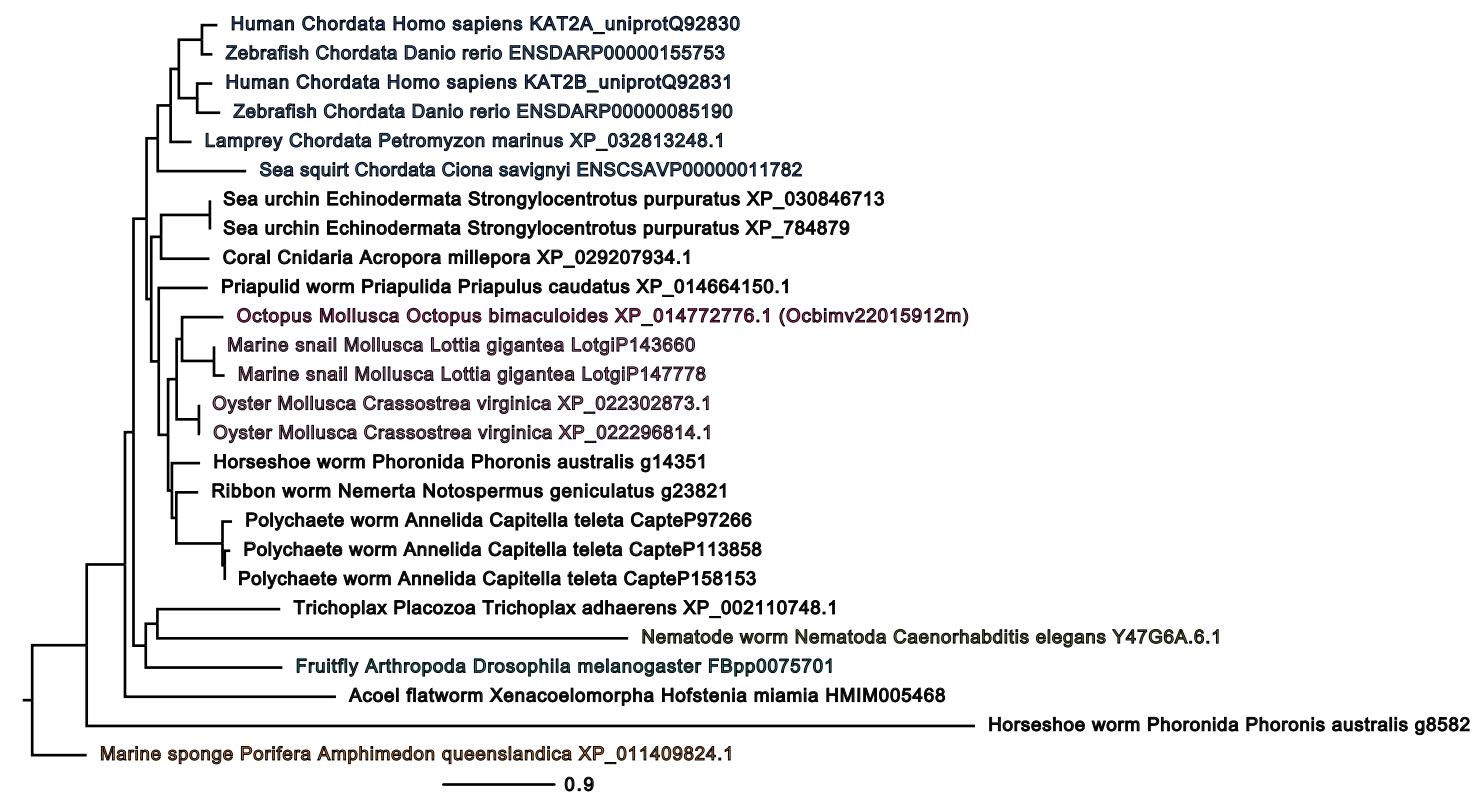

## C. HDAC8

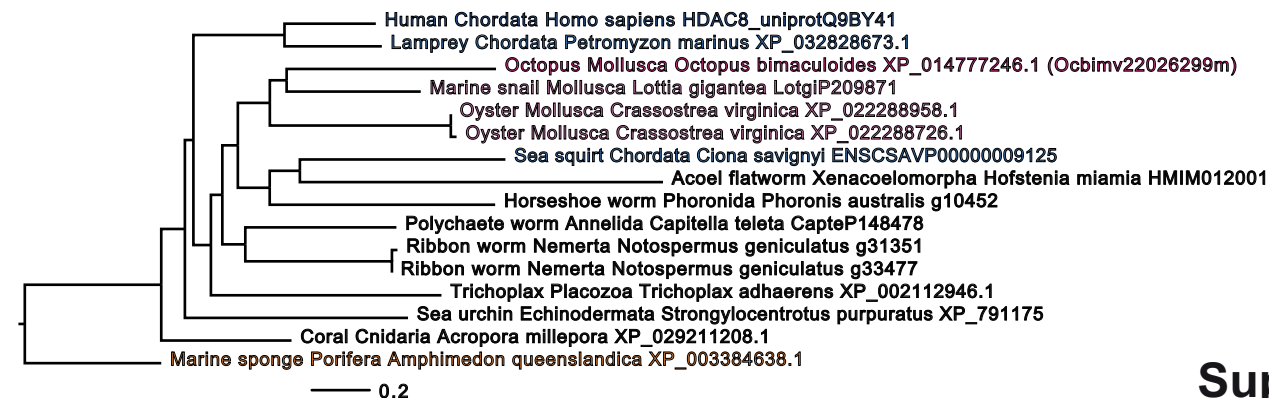



# A. Histone methyl-transferases

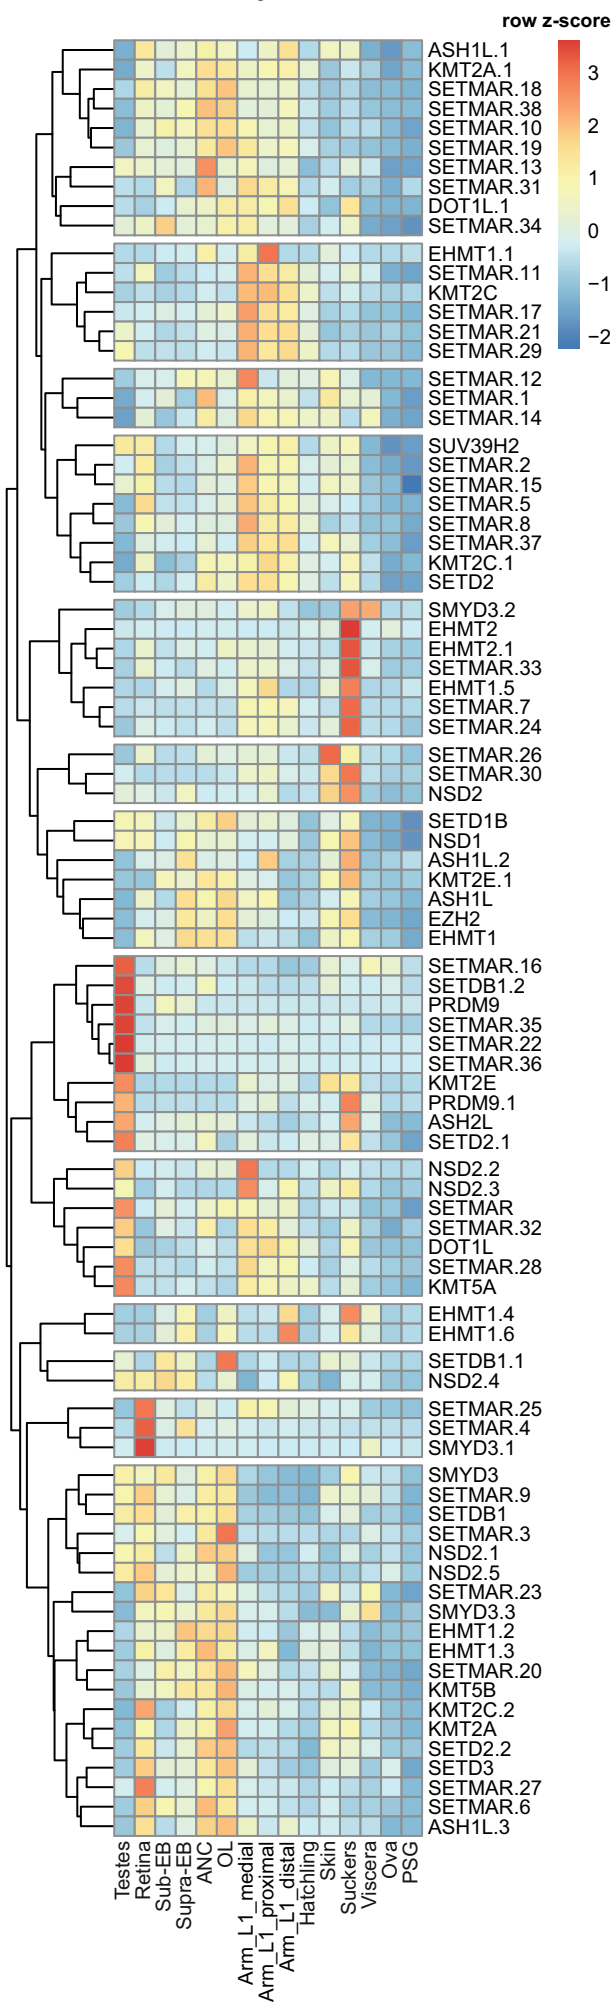

# B. Histone acetylation

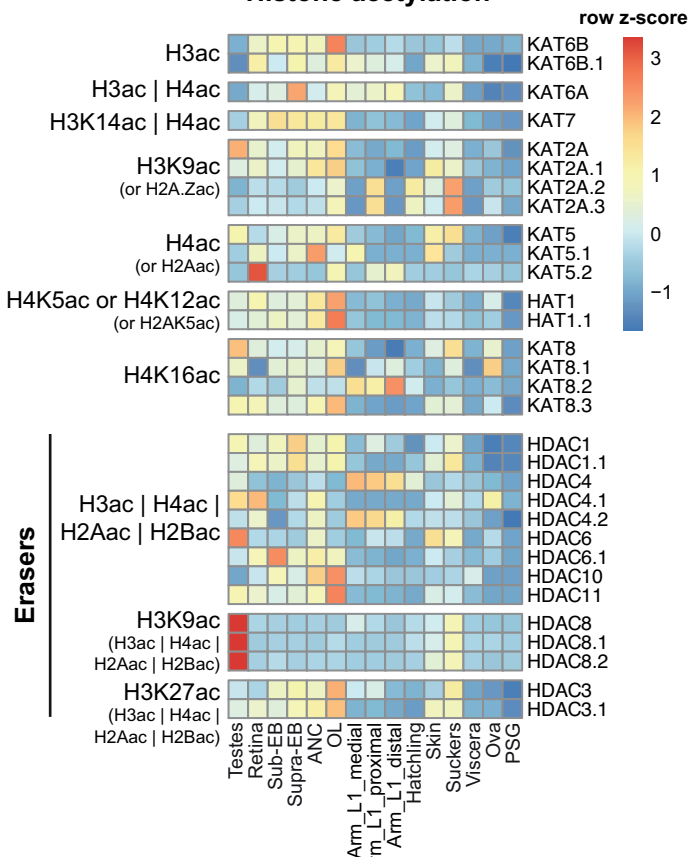

Supplement: Supplementary file [file media-1.pdf]
